# Supplementary material for: Oligomer formation, metalation, and the existence of aggregation-prone and mobile sequences within the intracrystalline protein family, Asprich
Source: Royal Society of Chemistry journal article supplement (doi:10.1039/c2fd20064c), 2012-01-01
Supplement: c2fd20064c.pdf [file c2fd20064c.pdf]

Oligomer formation, metalation, and the existence of  
aggregation-prone and mobile sequences within the  
intracrystalline protein family, Asprich. Electronic Supporting  
Information.

Moise Ndao, Christopher B. Ponce, and John Spencer Evans\*

Laboratory for Chemical Physics, Division of Basic Sciences and Craniofacial Biology, New  
York University College of Dentistry, 345 E. 24<sup>th</sup> Street, NY, NY 10010

\*Corresponding author. [jse1@nyu.edu](mailto:jse1@nyu.edu) tel: 212 998 9605  
fax: 212 995 4087

Table S1: ESI-MS ion trap Asprich “3” protein – cation adduct species.

| Sample                        | Peak (Fig 2)                   | Adduct Species                 | Observed Peak (m/z)           | Theoretical (m/z) |
|-------------------------------|--------------------------------|--------------------------------|-------------------------------|-------------------|
| Apo Asprich “3”               |                                | $[M - 12H^+]^{12-}$            | 551.3                         | 551.3             |
|                               |                                | $[M - 11H^+]^{11-}$            | 601.3                         | 601.4             |
|                               |                                | $[M - 10H^+]^{10-}$            | 661.3                         | 661.7             |
|                               |                                | $[M - 9H^+]^{9-}$              | 734.9                         | 735.3             |
|                               |                                | $[M - 8H^+]^{8-}$              | 826.9                         | 827.4             |
|                               |                                | $[M - 7H^+]^{7-}$              | 945.2                         | 945.7             |
|                               |                                | $[M - 6H^+]^{6-}$              | 1102.8                        | 1103.5            |
| Asprich “3”-Eu <sup>3+</sup>  |                                | $[M + Eu^{3+} - 10H^+]^{7-}$   | 754.1                         | 754.3             |
|                               | a                              | $[M + Eu^{3+} - 13H^+]^{10-}$  | 810.2                         | 810.6             |
|                               | b                              | $[M + Eu^{3+} - 19H^+]^{16-}$  | 868.0                         | 868.0             |
|                               |                                | $[M + Eu^{3+} - 9H^+]^{6-}$    | 886.0                         | 887.2             |
|                               |                                | $[M + Eu^{3+} - 33H^+]^{30-}$  | 946.0                         | 946.3             |
|                               |                                | $[M + Eu^{3+} - 54H^+]^{51-}$  | 925.0                         | 925.1             |
|                               |                                | $[M + 3Eu^{3+} - 12H^+]^{3-}$  | 1007.0                        | 1007.0            |
|                               |                                | $[M + 2Eu^{3+} - 25H^+]^{19-}$ | 1013.0                        | 1013.1            |
|                               |                                | $[M + Eu^{3+} - 30H^+]^{27-}$  | 1067.1                        | 1067.6            |
|                               | Asprich “3” - La <sup>3+</sup> |                                | $[M + La^{3+} - 30H^+]^{27-}$ | 770.0             |
| A                             |                                | $[M + 2La^{3+} - 51H^+]^{45-}$ | 827.9                         | 828.0             |
| B                             |                                | $[M + 2La^{3+} - 33H^+]^{27-}$ | 845.9                         | 846.0             |
|                               |                                | $[M + 3La^{3+} - 14H^+]^{5-}$  | 1015.7                        | 1015.1            |
| Asprich “3” -Ca <sup>2+</sup> |                                | $[M + Ca^{2+} - 12H^+]^{10-}$  | 590.0                         | 590.3             |
|                               |                                | $[M + 3Ca^{2+} - 23H^+]^{17-}$ | 648.0                         | 648.3             |
|                               |                                | $[M + Ca^{2+} - 11H^+]^{9-}$   | 700.0                         | 700.5             |
|                               |                                | $[M + 4Ca^{2+} - 14H^+]^{6-}$  | 758.0                         | 758.4             |
|                               | 1                              | $[M + 2Ca^{2+} - 12H^+]^{8-}$  | 811.9                         | 811.9             |
|                               | 2                              | $[M + 4Ca^{2+} - 12H^+]^{4-}$  | 819.9                         | 820.5             |
|                               | 3                              | $[M + 4Ca^{2+} - 25H^+]^{17-}$ | 869.8                         | 869.9             |
|                               |                                | $[M + 3Ca^{2+} - 23H^+]^{17-}$ | 931.8                         | 931.9             |
|                               |                                | $[M + 3Ca^{2+} - 10H^+]^{4-}$  | 945.2                         | 945.4             |

Units of mass are in Daltons (Da). Peak identifiers (numeric or alphabetic) are given on Figure 2 over the assigned monoisotopic centroid peaks.
